# Supplementary material for: Chemical Constituents and α-Glucosidase Inhibitory, Antioxidant and Hepatoprotective Activities of Ampelopsis grossedentata
Source: MDPI journal article supplement (doi:10.3390/molecules28247956), 2023-12-05
Supplement: s1 [file s1]

# Supporting Information

## Chemical Constituents and $\alpha$ -Glucosidase Inhibitory, Antioxidant and Hepatoprotective Activities of *Ampelopsis grossedentata*

Qu-Jing Luo <sup>1</sup>, Wen-Chao Zhou <sup>1</sup>, Xin-Yi Liu <sup>1</sup>, Ya-Jie Li <sup>1</sup>, Qing-Ling Xie <sup>1</sup>, Bin Wang <sup>1</sup>,  
Chao Liu <sup>1,2</sup>, Wen-Mao Wang <sup>1,2</sup>, Wei Wang <sup>1,\*</sup> and Xu-Dong Zhou <sup>1,\*</sup>

<sup>1</sup> TCM and Ethnomedicine Innovation & Development International Laboratory, School of Pharmacy,  
Hunan University of Chinese Medicine, Changsha 410208, China; ishtar61@163.com (Q.-J.L.);  
zhouwenchao6815@163.com (W.-C.Z.); 18182086610@163.com (X.-Y.L.); 17872355957@163.com (Y.-J.L.);  
xieql12@126.com (Q.-L.X.); 004146@hnucm.edu.cn (B.W.); 18674403333@163.com (C.L.);  
13907442657@163.com (W.-M.W.)

<sup>2</sup> Zhangjiajie Meicha Technology Research Center, Hunan Qiankun Biotechnology Co., Ltd.,  
Zhangjiajie 427099, China

\* Correspondence: wangwei402@hotmail.com (W.W.); xudongzhou999@hnucm.edu.cn (X.-D.Z.);  
Tel.: +86-731-8845-8240 (W.W.); +86-731-8845-8240 (X.-D.Z.); Fax: +86-8845-8227 (W.W.);  
+86-731-8845-8240 (X.-D.Z.)

## Contents:

Figure S1.  $^1\text{H}$  NMR spectrum of meichasu A (**1**) ( $\text{CD}_3\text{OD}$ , 600 MHz).

Figure S2.  $^{13}\text{C}$  NMR spectrum of meichasu A (**1**) ( $\text{CD}_3\text{OD}$ , 125 MHz).

Figure S3. DEPT 135° spectrum of meichasu A (**1**) ( $\text{CD}_3\text{OD}$ , 125 MHz).

Figure S4. HSQC spectrum of meichasu A (**1**).

Figure S5. HMBC spectrum of meichasu A (**1**).

Figure S6.  $^1\text{H}$ - $^1\text{H}$  COSY spectrum of meichasu A (**1**).

Figure S7. HR-ESIMS spectrum of meichasu A (**1**).

Figure S8. UV spectrum of meichasu A (**1**).

Figure S9. IR spectrum of meichasu A (**1**).

Figure S10. CD spectrum of meichasu A (**1**).

Figure S11.  $^1\text{H}$  NMR spectrum of meichasu B (**2**) ( $\text{CD}_3\text{OD}$ , 600 MHz).

Figure S12.  $^{13}\text{C}$  NMR spectrum of meichasu B (**2**) ( $\text{CD}_3\text{OD}$ , 125 MHz).

Figure S13. DEPT 135° spectrum of meichasu B (**2**) ( $\text{CD}_3\text{OD}$ , 125 MHz).

Figure S14. HSQC spectrum of meichasu B (**2**).

Figure S15. HMBC spectrum of meichasu B (**2**).

Figure S16.  $^1\text{H}$ - $^1\text{H}$  COSY spectrum of meichasu B (**2**).

Figure S17. HR-ESIMS spectrum of meichasu B (**2**).

Figure S18. UV spectrum of meichasu B (**2**).

Figure S19. IR spectrum of meichasu B (**2**).

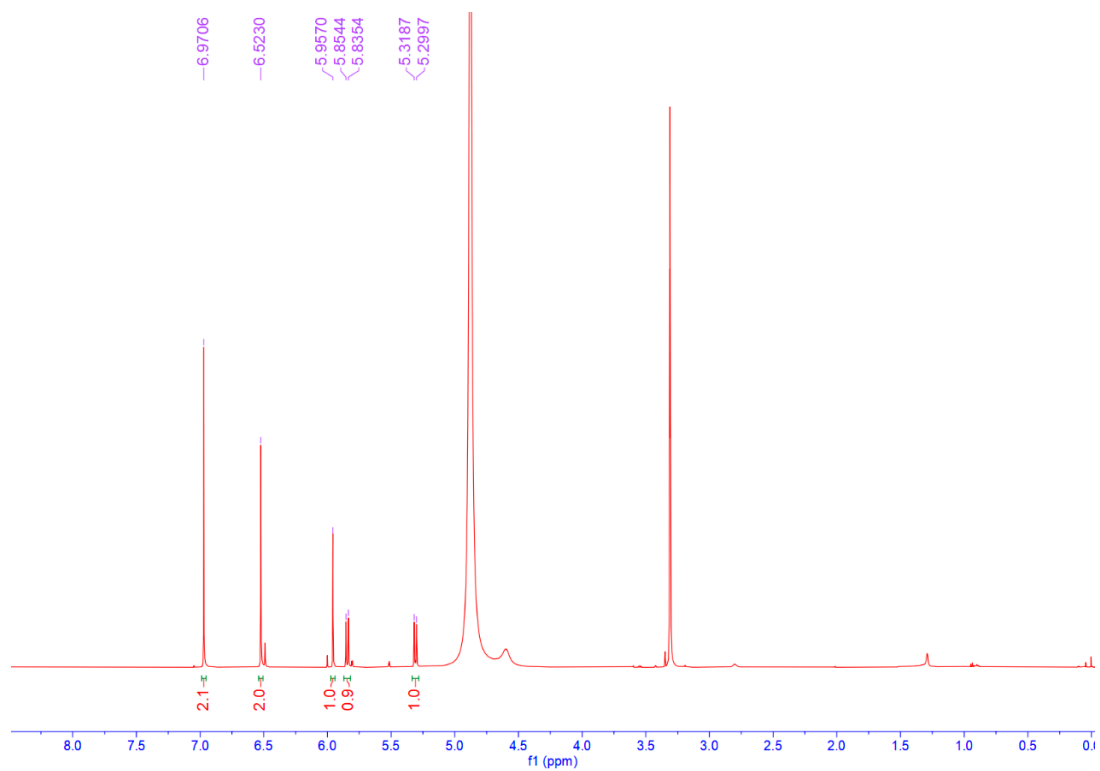

Figure S1. <sup>1</sup>H NMR spectrum of meichasu A (**1**) (CD<sub>3</sub>OD, 600 MHz).

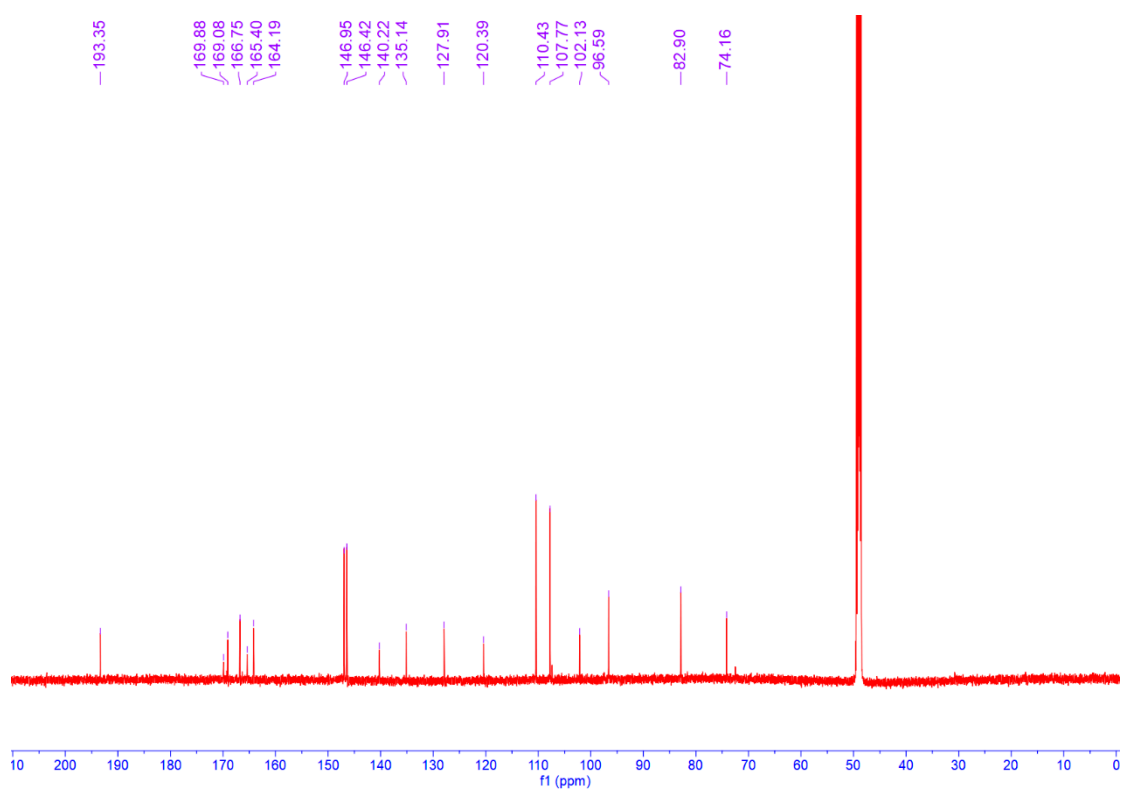

Figure S2. <sup>13</sup>C NMR spectrum of meichasu A (**1**) (CD<sub>3</sub>OD, 151 MHz).

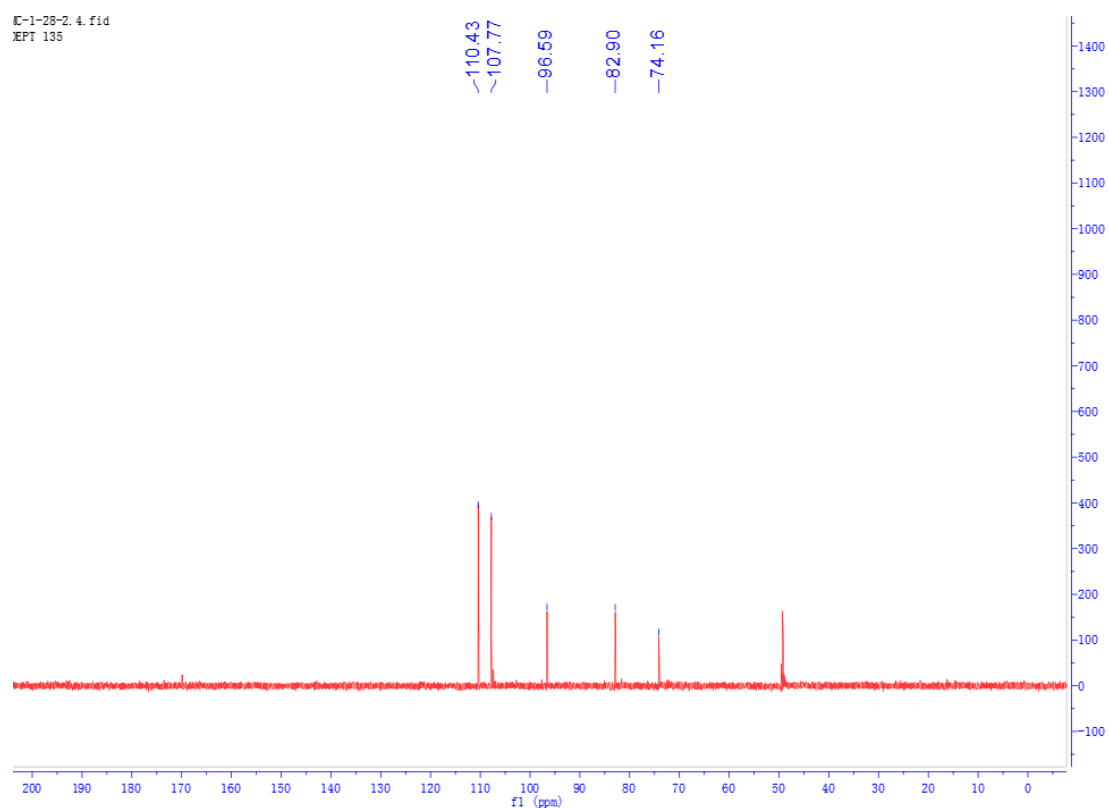

Figure S3. DEPT 135° spectrum of meichasu A (**1**) (CD<sub>3</sub>OD, 151 MHz).

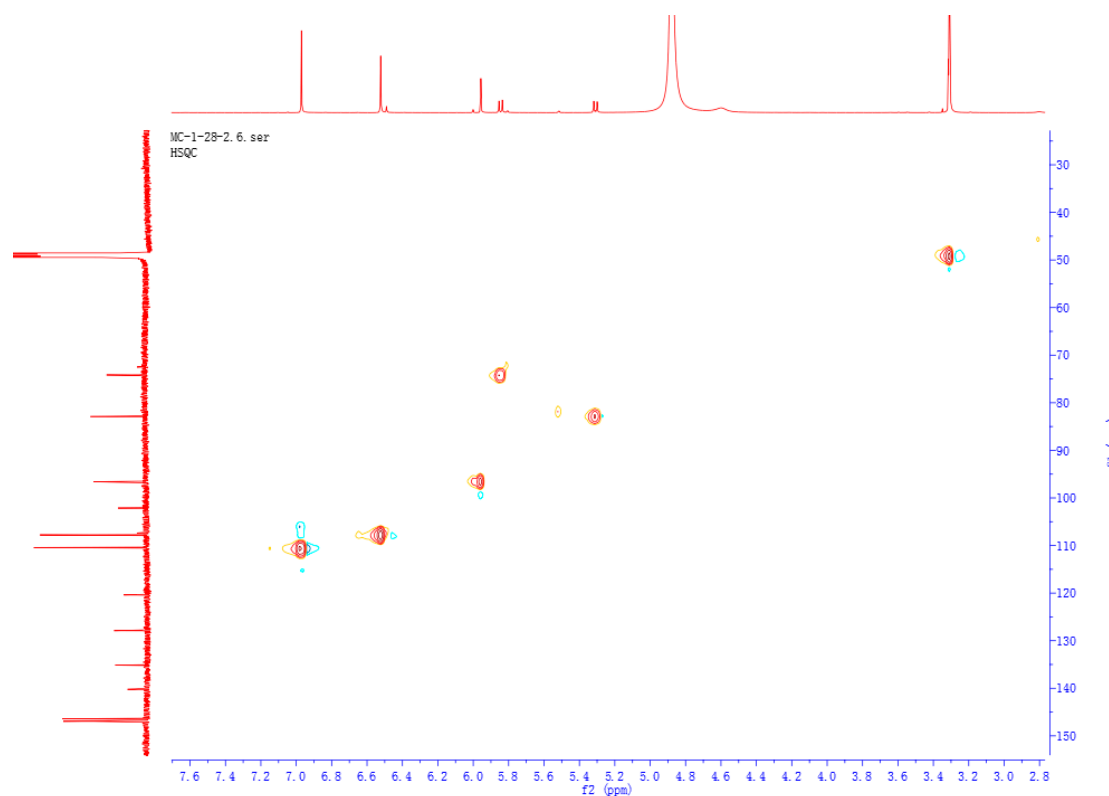

Figure S4. HSQC spectrum of meichasu A (**1**).

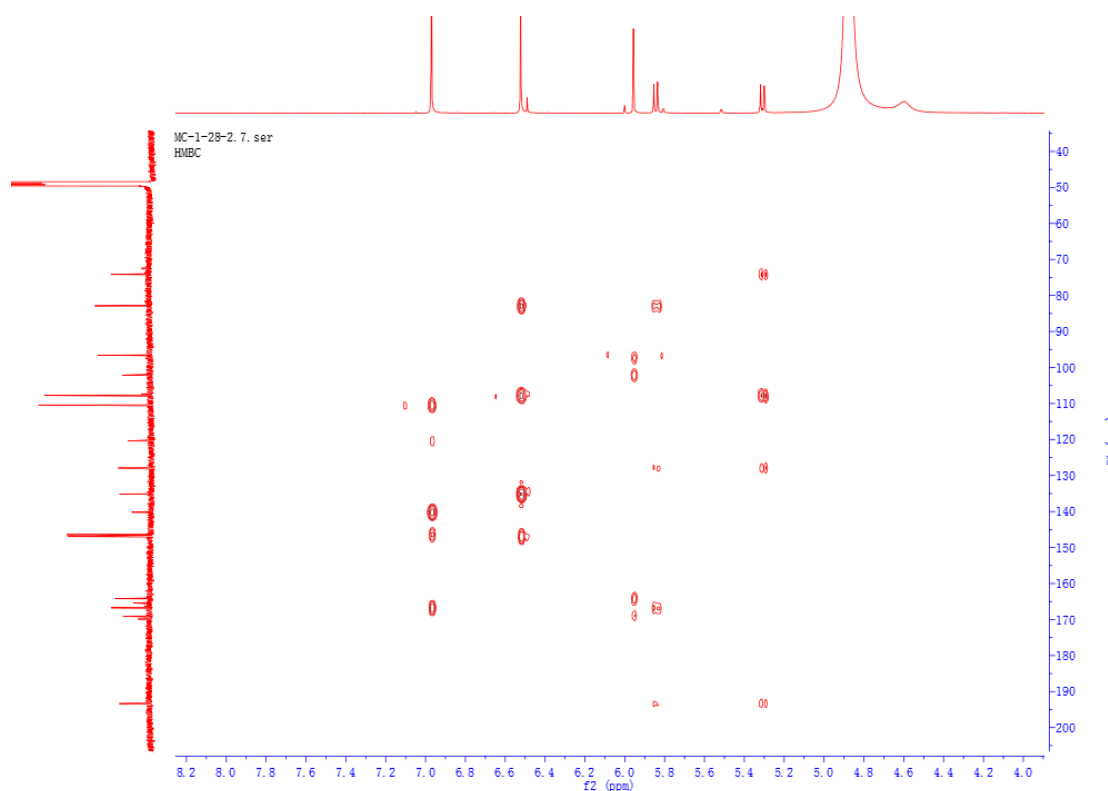

Figure S5. HMBC spectrum of meichasu A (**1**).

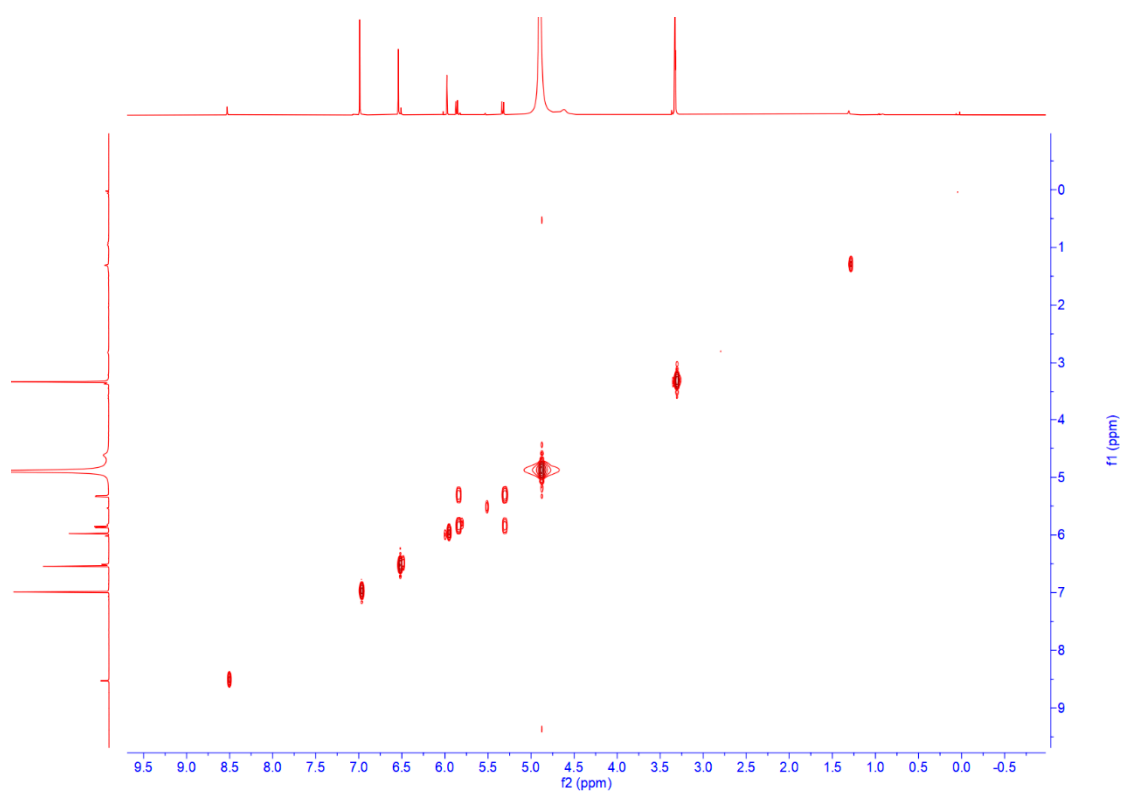

Figure S6.  $^1\text{H}$ - $^1\text{H}$  COSY spectrum of meichasu A (**1**).

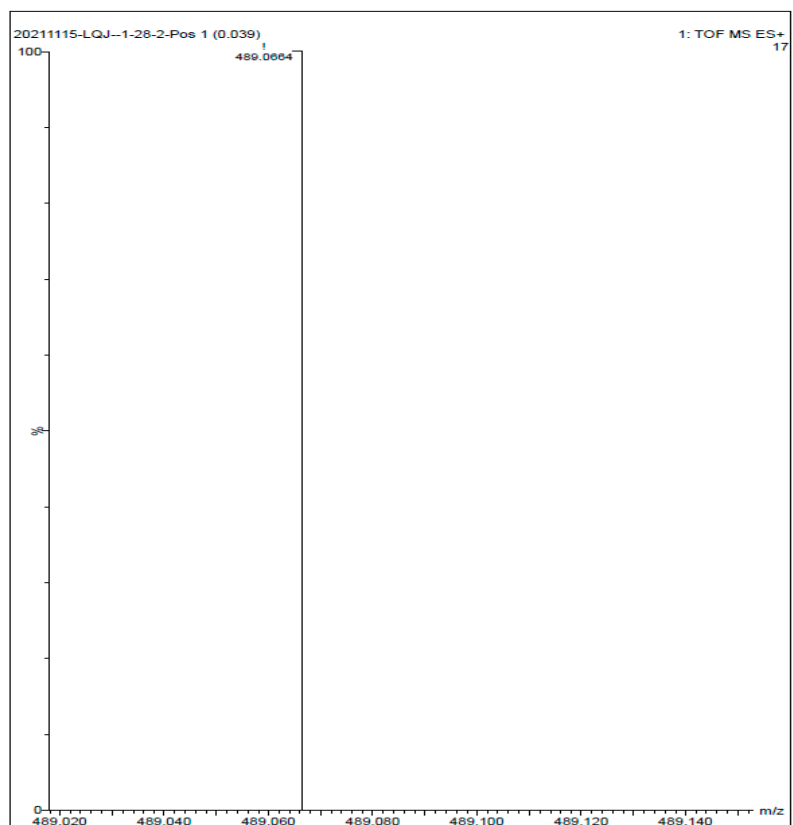

Figure S7. HR-ESIMS spectrum of meichasu A (**1**).

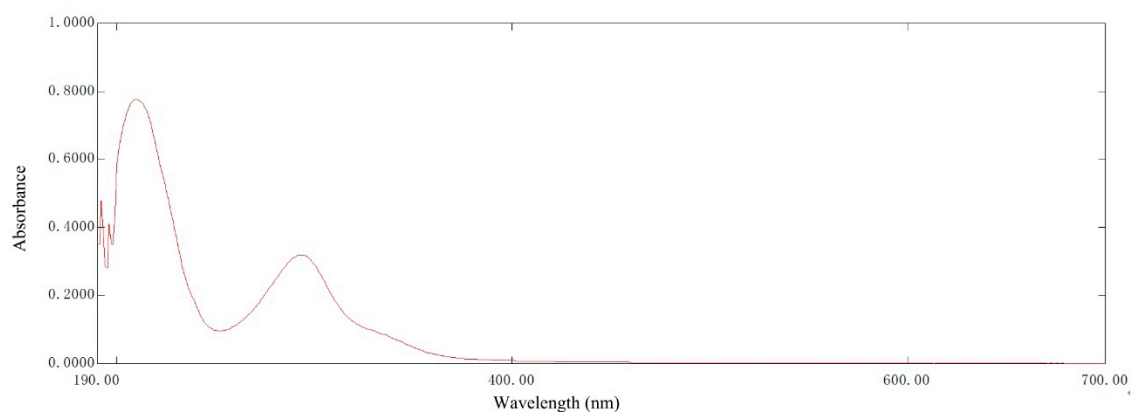

Figure S8. UV spectrum of meichasu A (**1**).

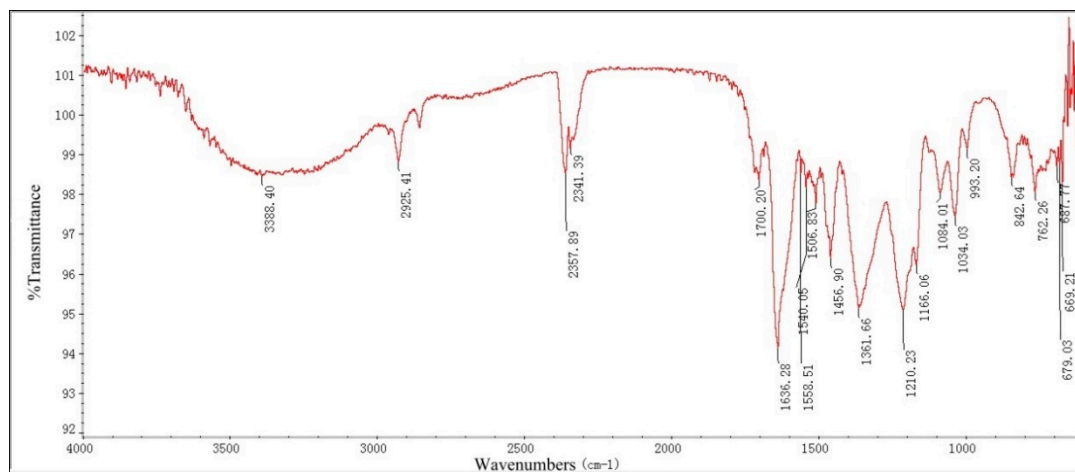

Figure S9. IR spectrum of meichasu A (**1**).

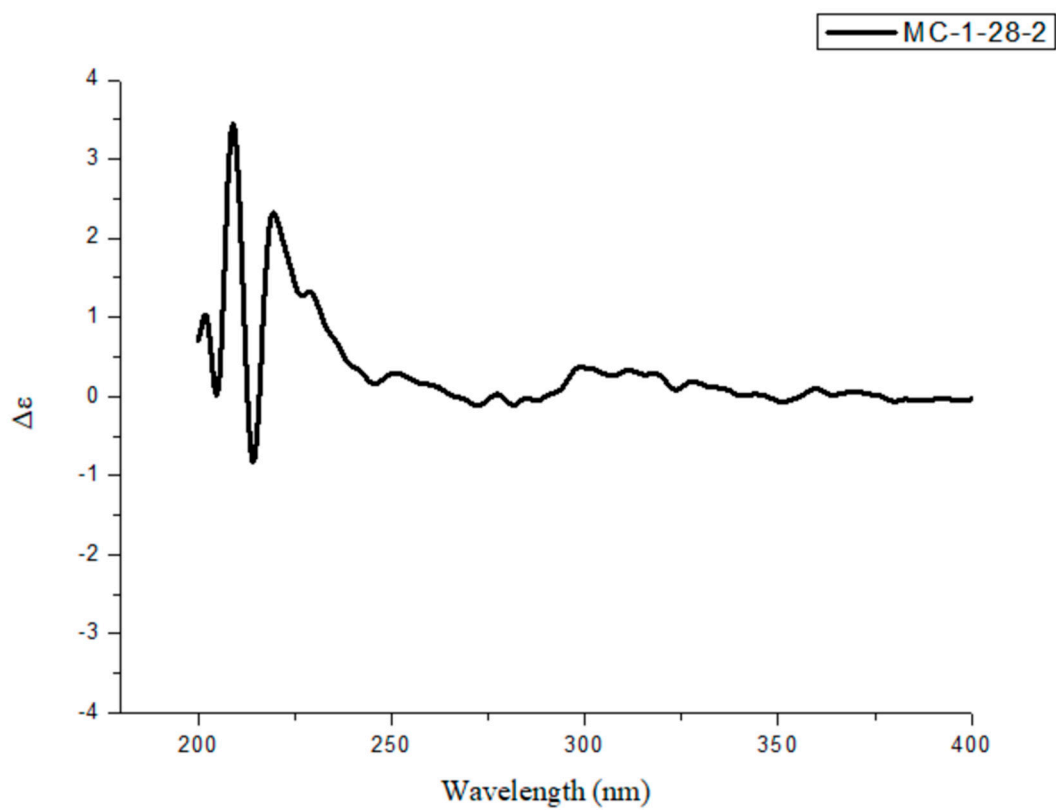

Figure S10. CD spectrum of meichasu A (**1**).

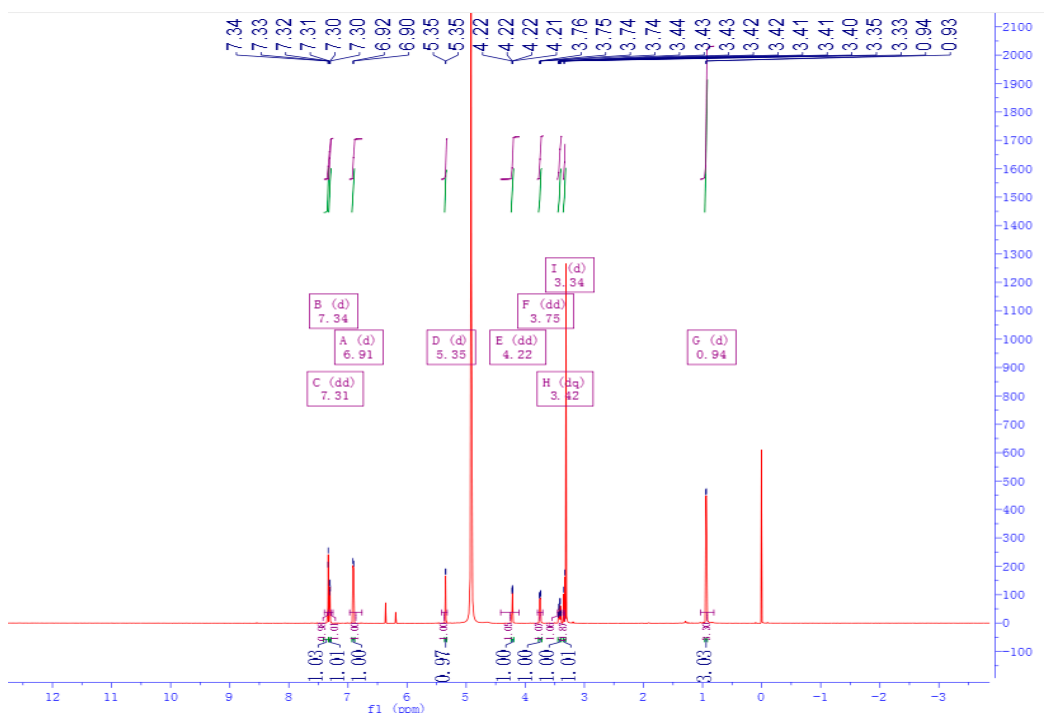

Figure S11. <sup>1</sup>H NMR spectrum of meichasu B (**2**) (CD<sub>3</sub>OD, 600 MHz).

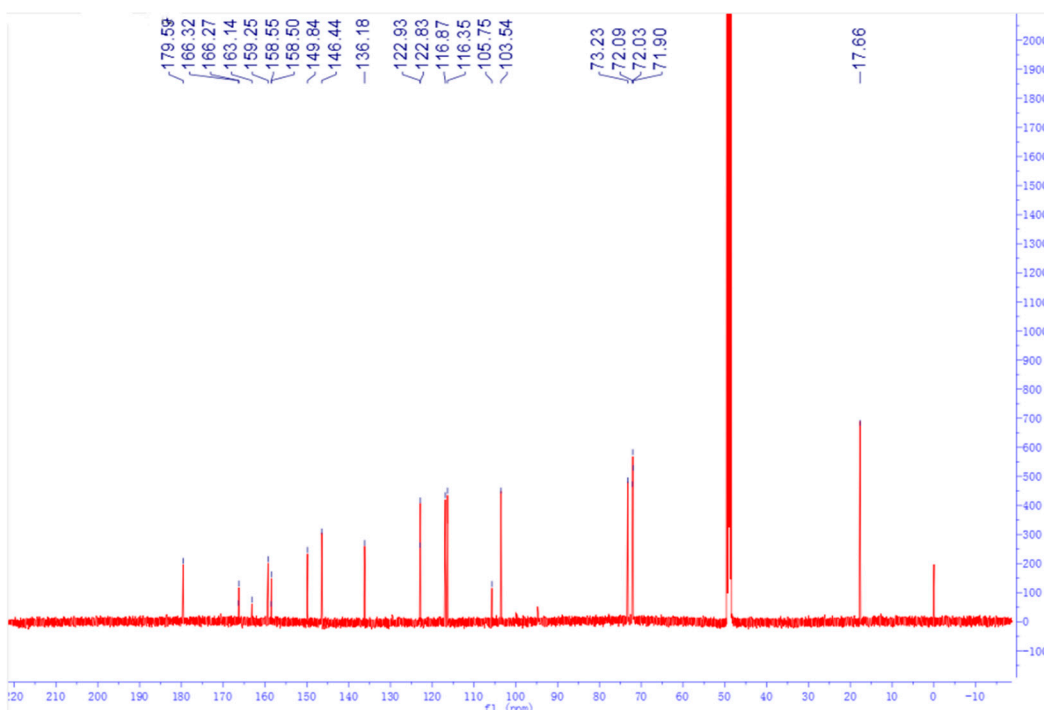

Figure S12. <sup>13</sup>C NMR spectrum of meichasu B (**2**) (CD<sub>3</sub>OD, 151 MHz).



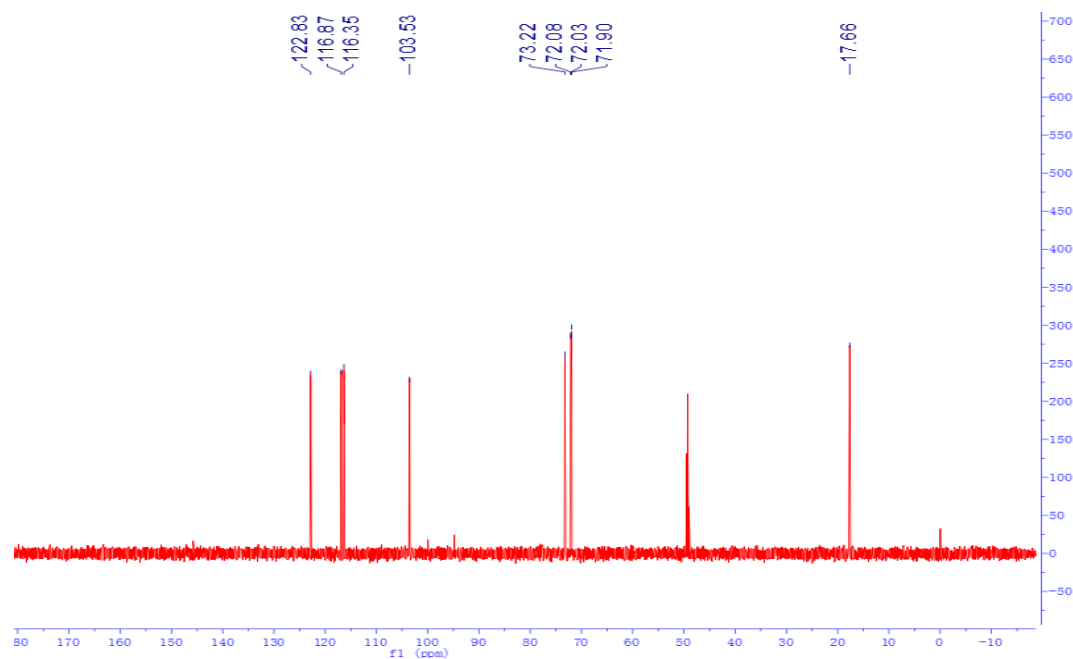

Figure S13. DEPT 135° spectrum of meichasu B (2) (CD<sub>3</sub>OD, 151 MHz).

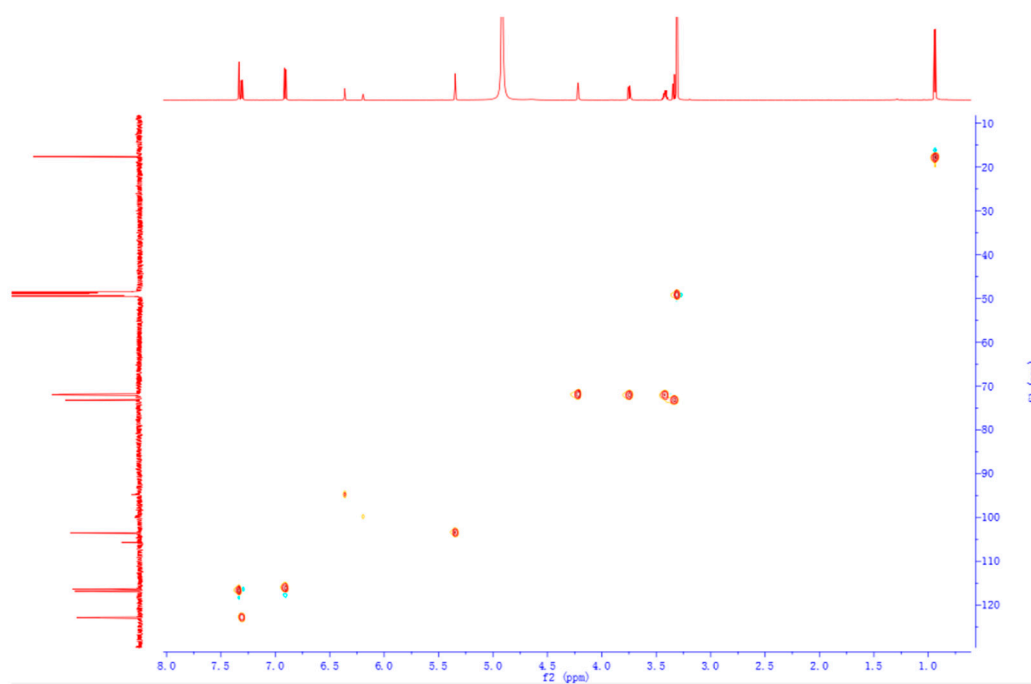

Figure S14. HSQC spectrum of meichasu B (2).

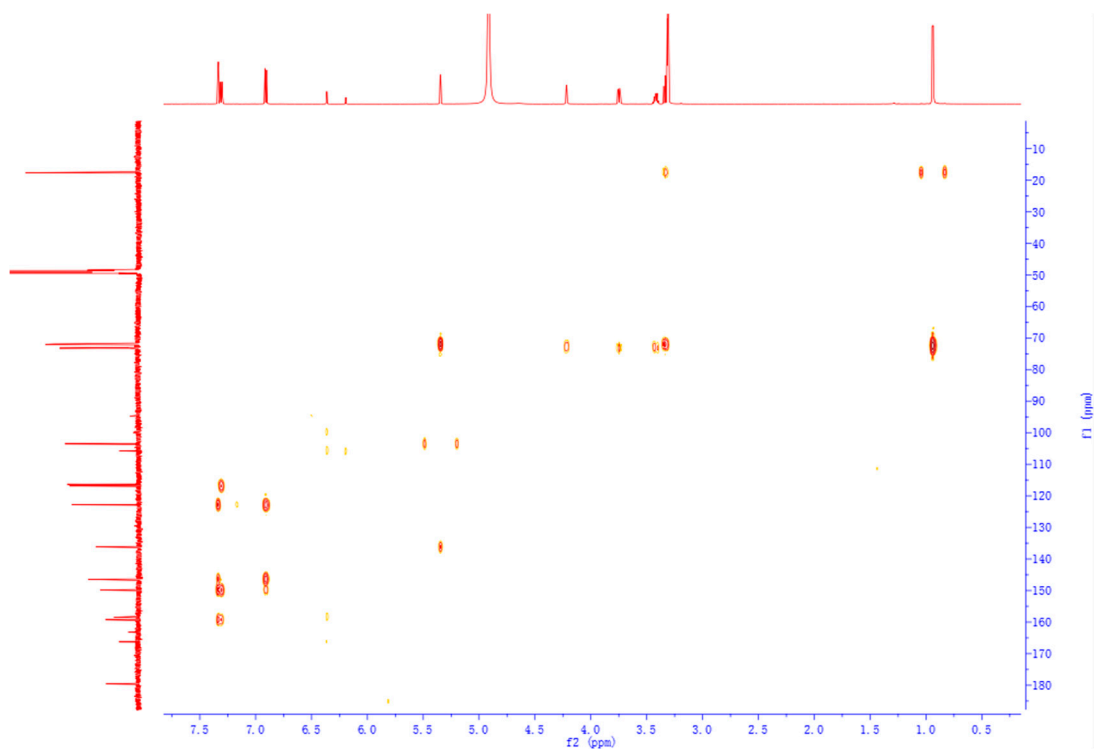

Figure S15. HMBC spectrum of meichasu B (**2**).

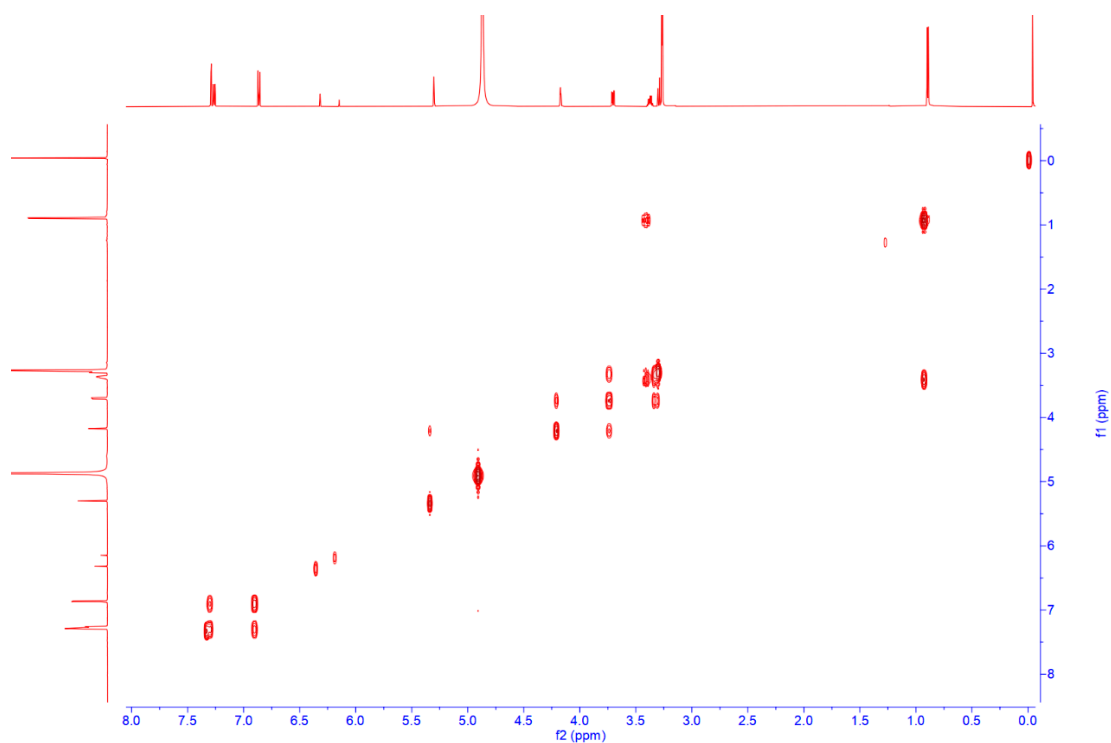

Figure S16.  $^1\text{H}$ - $^1\text{H}$  COSY spectrum of meichasu B (**2**).

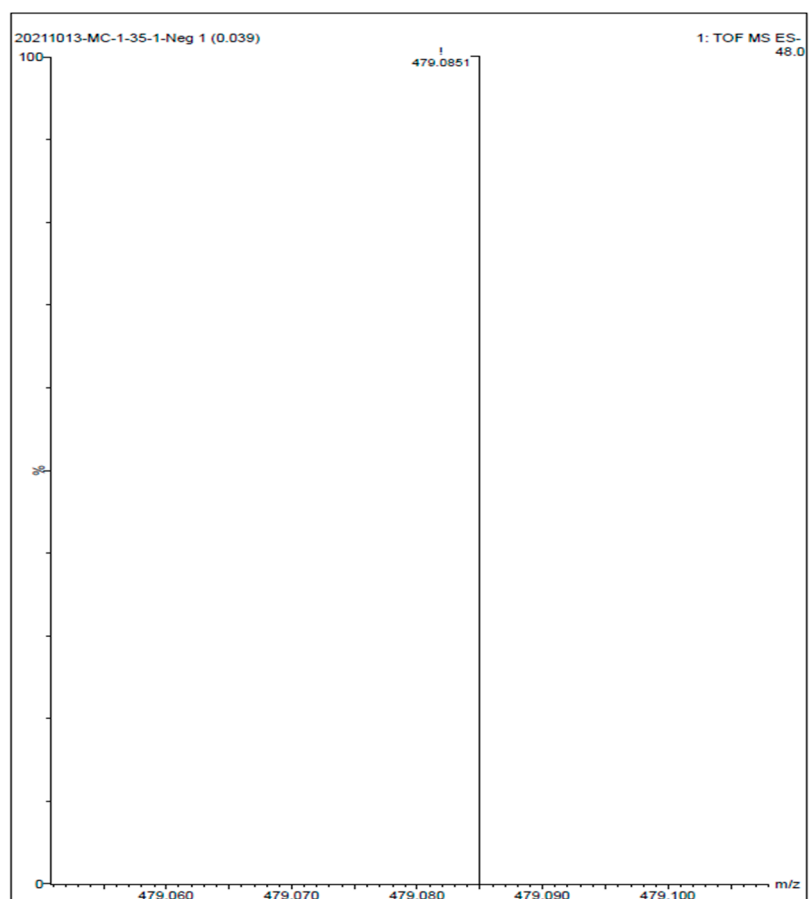

Figure S17. HR-ESIMS spectrum of meichasu B (**2**).

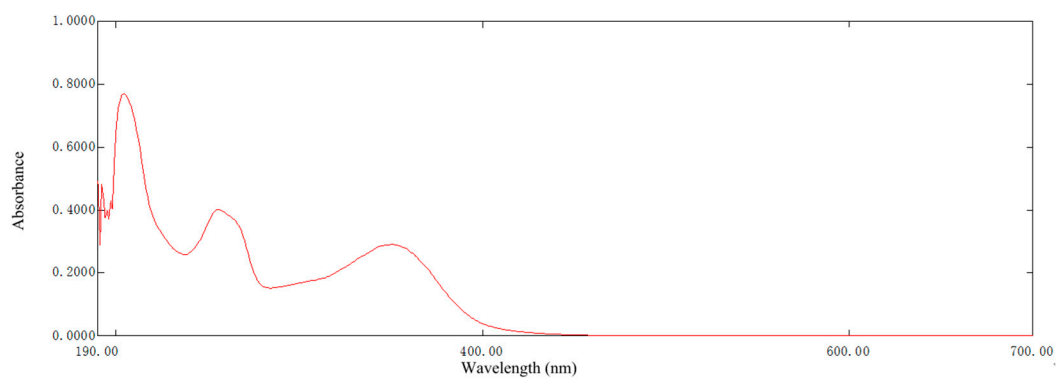

Figure S18. UV spectrum of meichasu B (**2**).

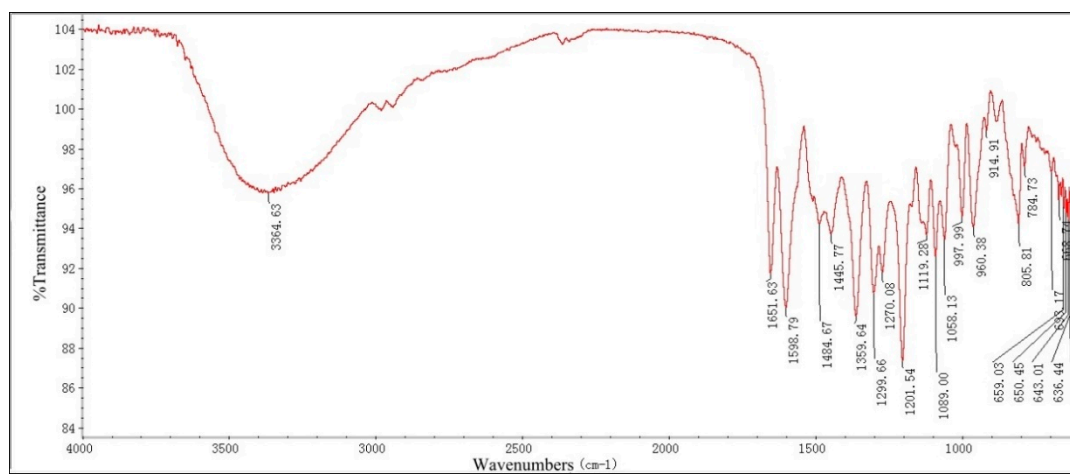

Figure S19. IR spectrum of meichasu B (2).
